# Supplementary material for: Built‐in RNA‐mediated chaperone (chaperna) for antigen folding tailored to immunized hosts
Source: PubMed Central journal article supplement (PMC7262357; doi:10.1002/bit.27355), 2020-05-02
Supplement: BIT-117-1990-s002.pdf [file BIT-117-1990-s002.pdf]

## **Built-in RNA-mediated Chaperone (Chaperna) for Antigen Folding Tailored to Immunized Hosts**

Young-Seok Kim<sup>1</sup>, Jongkwan Lim<sup>1</sup>, Jemin Sung<sup>1</sup>, Yucheol Cheong<sup>1</sup>, Eun-Young Lee<sup>2</sup>, Jihoon Kim<sup>1</sup>, Hana Oh<sup>1</sup>, Yeon-Sook Kim<sup>3</sup>, Nam-Hyuk Cho<sup>4</sup>, Seongil Choi<sup>5</sup>, Sang-Moo Kang<sup>6</sup>, Jae-Hwan Nam<sup>2</sup>, Wonil Chae<sup>1\*</sup> and Baik L. Seong<sup>1\*</sup>

<sup>1</sup>Department of Biotechnology, College of Life Sciences and Biotechnology, Yonsei University, Seoul, Republic of Korea

<sup>2</sup>Department of Biotechnology, The Catholic University of Korea, Bucheon, Republic of Korea

<sup>3</sup>Division of Infectious Diseases, Department of Internal Medicine, Chungnam National University School of Medicine, Daejeon, Republic of Korea

<sup>4</sup>Department of Microbiology and Immunology, Department of Biomedical Sciences, Seoul National University College of Medicine, Seoul, Republic of Korea

<sup>5</sup>Department of Biochemistry and Biophysics, Stockholm University, SE-106 91, Stockholm, Sweden

<sup>6</sup>Center for Inflammation, Immunity & Infection, Institute for Biomedical Sciences, Georgia State University, Atlanta, GA, USA

\*Corresponding author: Baik L. Seong (Phone number : +822-2123-2885, Fax number : +822-362-7265, email : blseong@yonsei.ac.kr,) and Wonil Chae (Phone number : +822-2123-4296, Fax number : +822-362-7265, E.mail : chaewonil@hanmail.net)

**Running title:** Chaperna-Mediated Antigen Folding

## Supplementary Figures and Tables

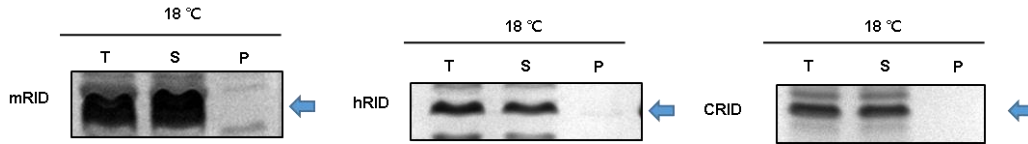

**Supplementary Figure 1.** Expression levels of chaperna (mRID, hRID, and cRID) produced using an *Escherichia coli* expression system were analyzed by SDS-PAGE.

**Supplementary Table 1.** Point mutations sites (RNA interaction domain) of mRIDs (wild-type (wt), 2m mutant, and 9m mutant).

|                                                                           |                                                                                                                 |
|---------------------------------------------------------------------------|-----------------------------------------------------------------------------------------------------------------|
| mRID(wt) amino seq                                                        | HMSEQATLQESEVKVDGEQKLSKKNELKRRLKAEKKLAEKEAKQKEL<br>SEKQLNQTASAPNHTADNGVGAEETLDDDDDDSGENLYFQGTGSD<br>IVDKLHHHHHH |
| mRID(2m) amino seq<br>(K23A/K27A)                                         | HMSEQATLQESEVKVDGEQKLSANELARRLKAEEKLAEKEAKQKEL<br>SEKQLNQTASAPNHTADNGVGAEETLDDDDDDSGENLYFQGTGSD<br>IVDKLHHHHHH  |
| mRID(9m) amino seq<br>(K23A/K27A/R28A/K31A/K34A/<br>K35A/K39A/K42A /K44A) | HMSEQATLQESEVKVDGEQKLSANELAARLAEEAALAEAEAQAEL<br>SEKQLNQTASAPNHTADNGVGAEETLDDDDDDSGENLYFQGTGSD<br>IVDKLHHHHHH   |

### mRID-RBD solubility (18 °C)

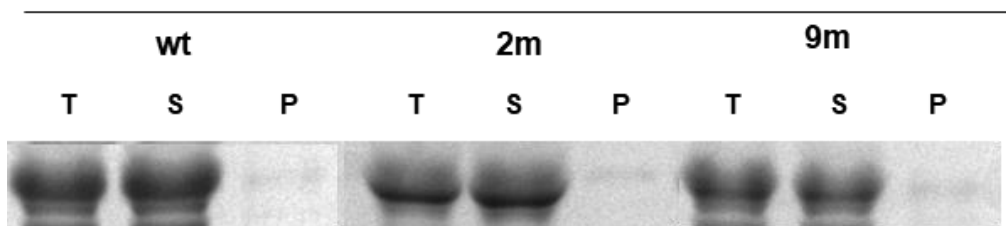

**Supplementary Figure 2.** Comparison of solubilities of wild-type (wt), 2m mutant, and 9m mutant mRID-RBD molecules. All proteins were expressed at 18°C. The cell lysates were separated into total (T), soluble (S), and pellet (P) fractions by centrifugation. The solubilities of the cell extracts were determined by SDS-PAGE.

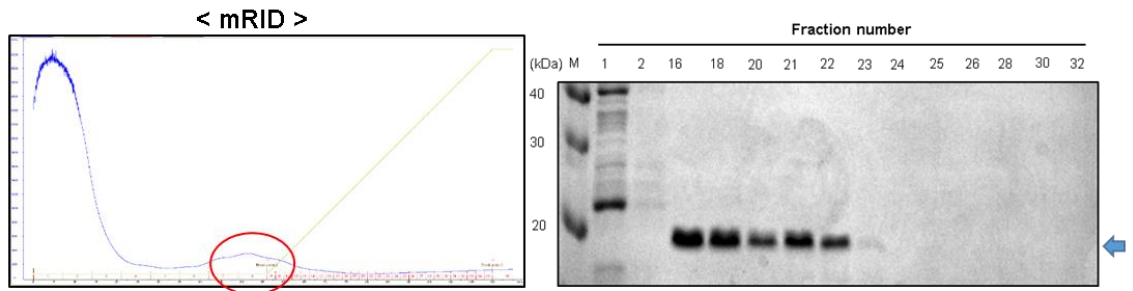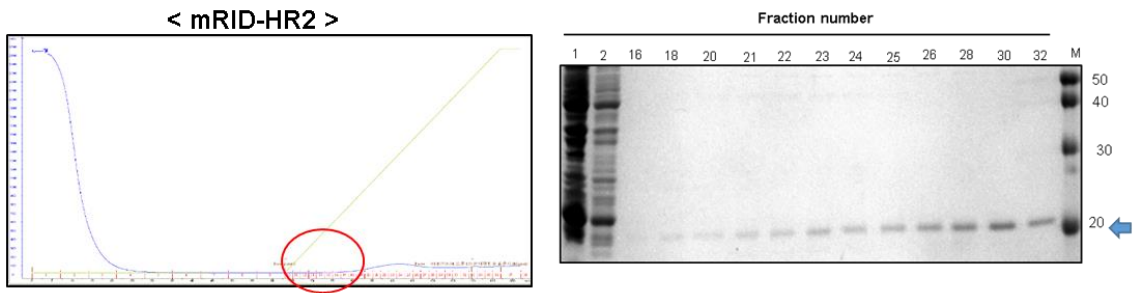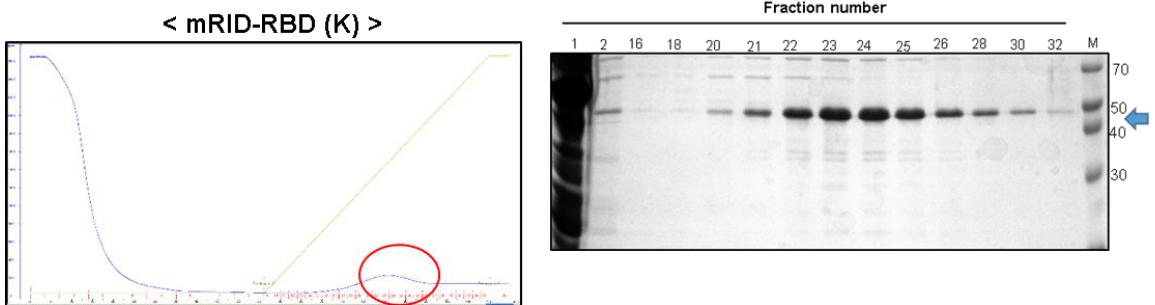

Continued at the next page

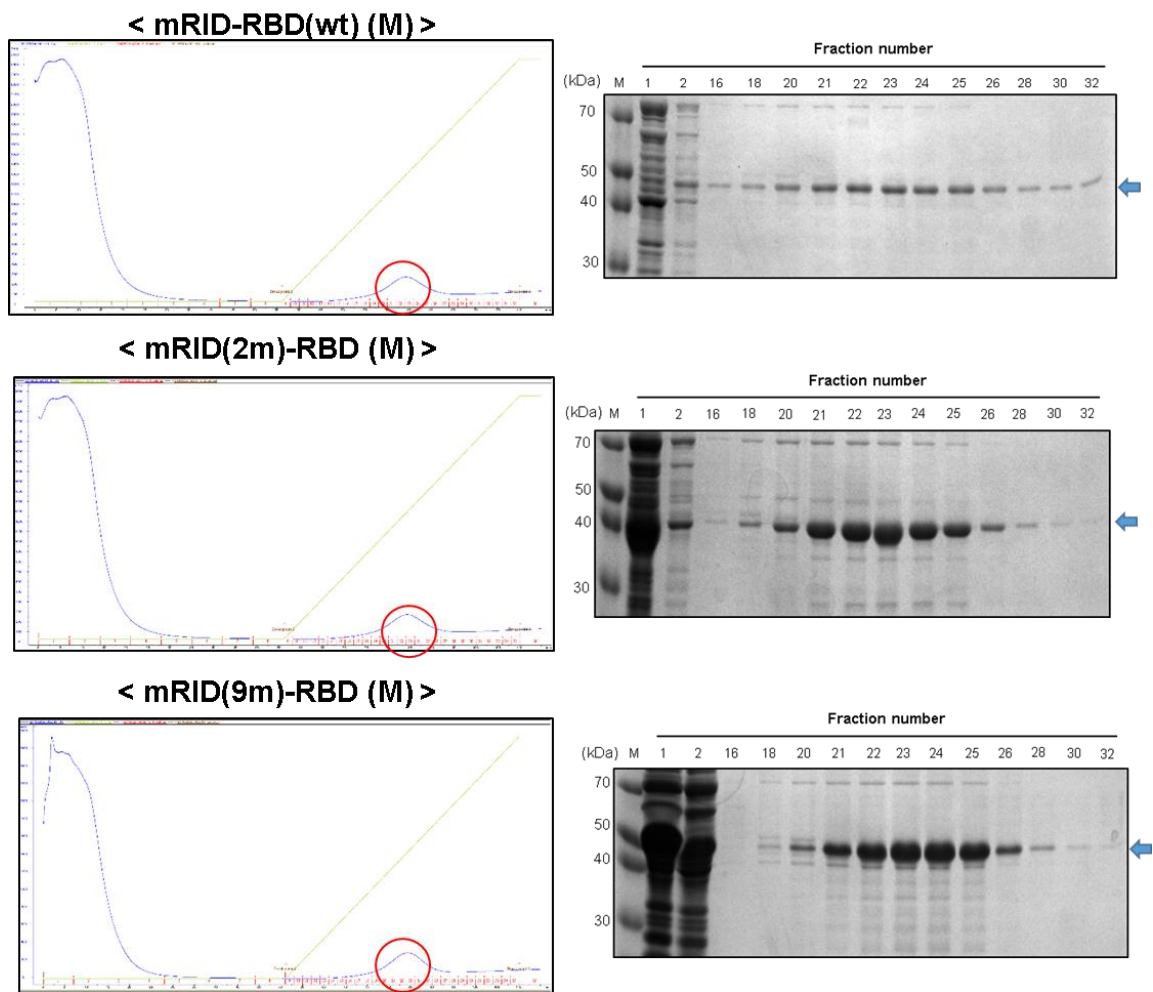

**Supplementary Figure 3. Purification profile of proteins obtained by SDS-PAGE.** mRID, mRID- RBD (Korea strain), mRID-HR2, mRID(wt)-RBD, mRID(2m)-RBD, and mRID(9m)-RBD were purified using Ni-NTA resin. The blue arrows indicate the purified target proteins.

< mRID(wt)-RBD >

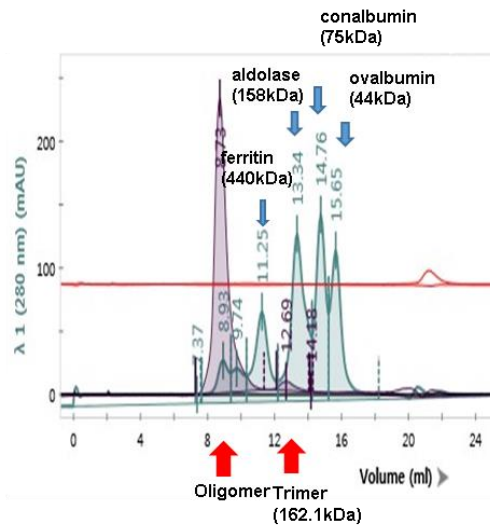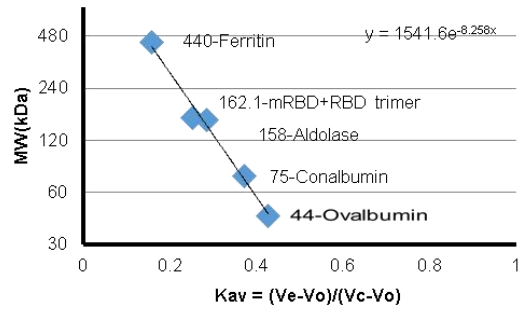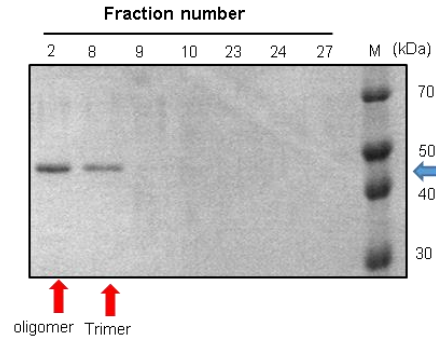

< mRID(9m)-RBD >

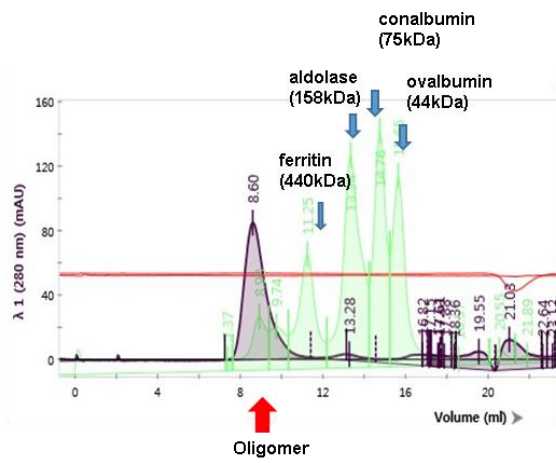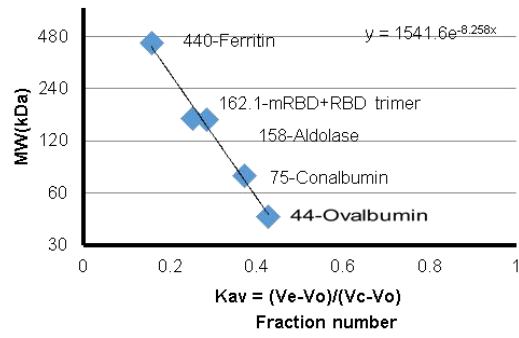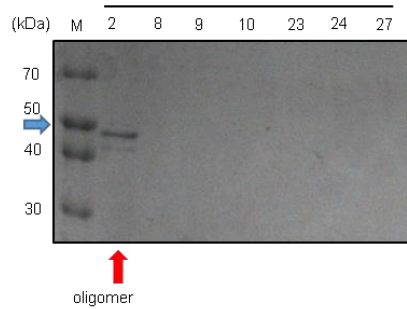

Continued at the next page

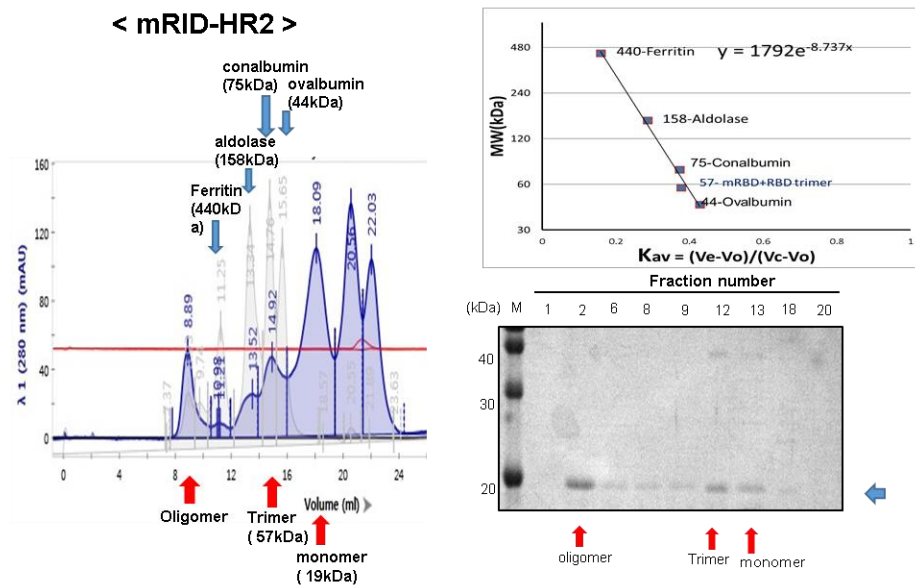

**Supplementary Figure 4. Size exclusion chromatography (SEC) profiles of mRID-fused proteins.**

Separation of purified mRID-RBD (wild-type (wt) and 9m mutant) and mRID-HR2 into oligomers, trimers, or monomers by SEC. The separated proteins were analyzed by SDS-PAGE. The protein sizes were determined using a high molecular weight (HMW) Gel Filtration Calibration Kit and a distribution coefficient ( $K_{av}$ ) graph. The blue arrows indicate the purified target proteins.

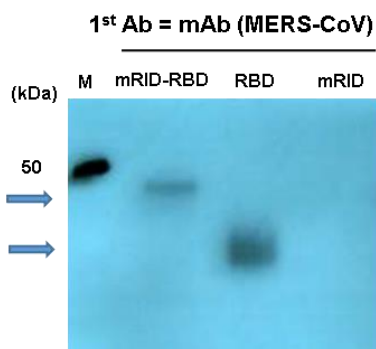

**Supplementary Figure 5. The binding of mAb29 to the RBD was assessed by western blot analysis. The blue arrows represent the target proteins. All proteins were purified using a Ni-NTA column.**
